# Supplementary material for: Interface engineering for a stable chemical structure of oxidized-black phosphorus via self-reduction in AlOx atomic layer deposition
Source: Royal Society of Chemistry journal article supplement (doi:10.1039/c8nr06652c), 2018-01-01
Supplement: c8nr06652c1.pdf [file c8nr06652c1.pdf]

## Supporting Information

Interface engineering for stable chemical structure of oxidized-black phosphorus *via* self-reduction in AlO<sub>x</sub> atomic layer deposition

Dae-Kyoung Kim,<sup>1</sup> Jimin Chae,<sup>1</sup> Seok-Bo Hong,<sup>1</sup> Hanbum Park,<sup>1</sup> Kwang-Sik Jeong,<sup>1</sup> Hyun-Woo Park,<sup>2</sup> Se-Ra Kwon,<sup>2</sup> Kwun-Bum Chung,<sup>2</sup> and Mann-Ho Cho<sup>1,\*</sup>

<sup>1</sup>Department of Physics, Yonsei University, Seoul 03722, Republic of Korea

<sup>2</sup>Division of Physics and Semiconductor Science, Dongguk University, Seoul 04620, Republic of Korea

Corresponding Author

\* E-mail: mh.cho@yonsei.ac.kr

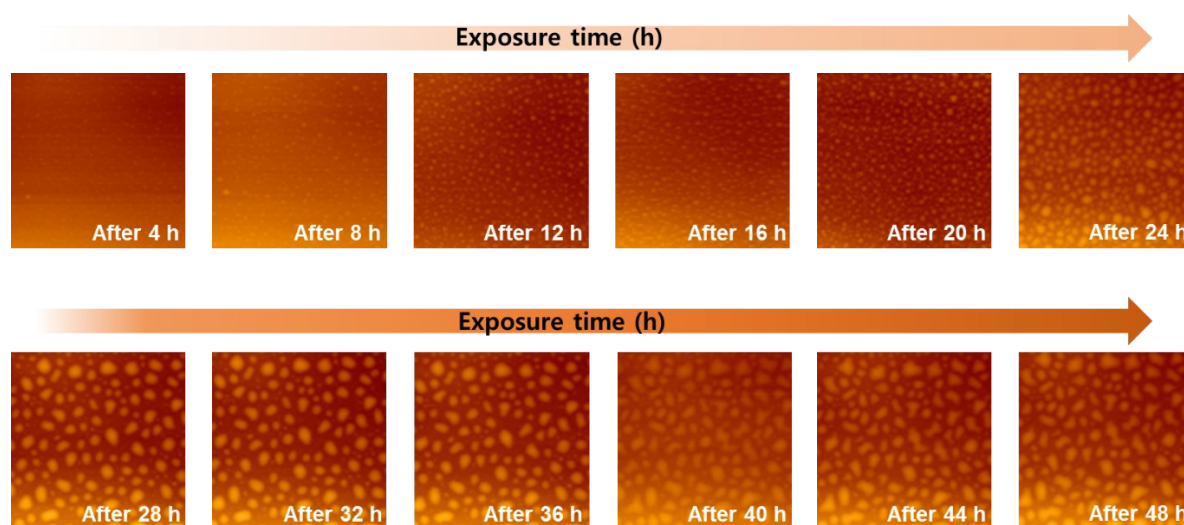

**Fig. S1** Atomic force microscopy characteristics of oxidized black phosphorus (BP) as a function of air exposure time. Time-dependence AFM images of the exfoliated BP surface from 4 h to 48 h under ambient conditions.

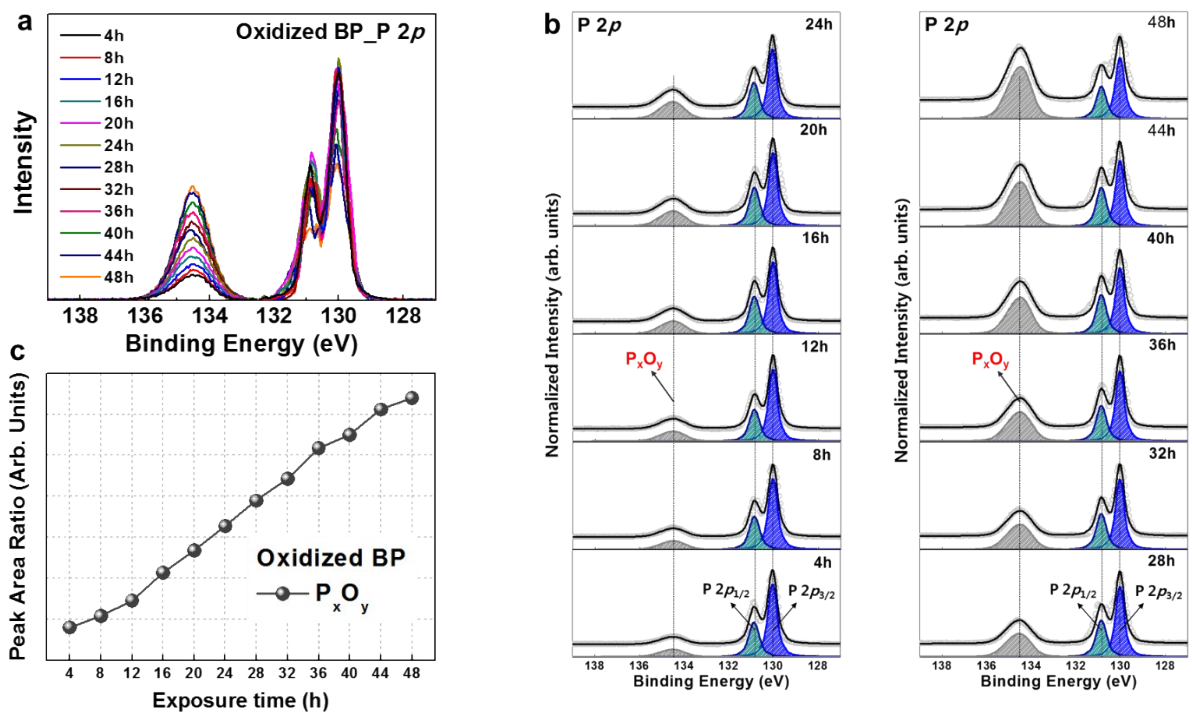

**Fig. S2** X-ray photoelectron spectroscopy characteristics of oxidized BP as a function of air exposure time. Time-dependent XPS of (a) raw, and (b) fitted spectra of P 2p core level of oxidized BP as a function of air exposure time (4 h to 48 h); (c) The peak area ratio of P<sub>x</sub>O<sub>y</sub> from the fitted XPS spectra (b).

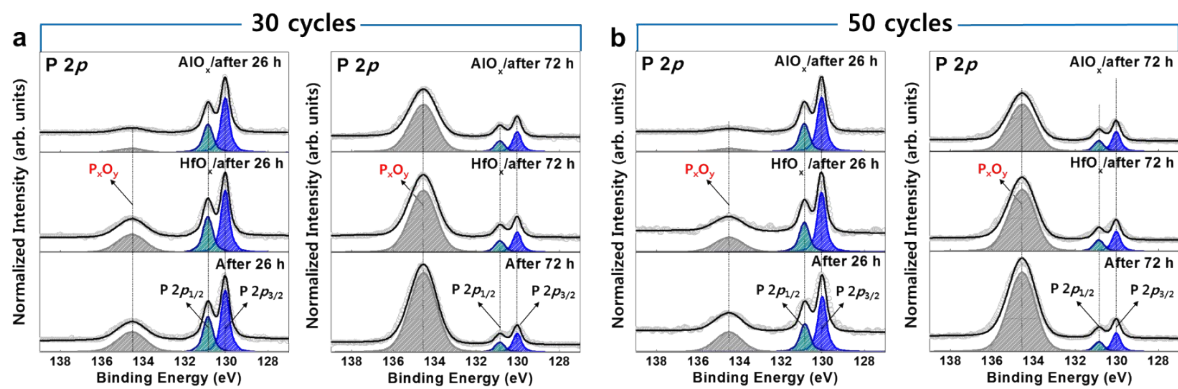

**Fig. S3** Comparison of chemical states of ALD-AIO<sub>x</sub> and HfO<sub>x</sub> on oxidized BP at surface exposure times. The fitted XPS spectra of the P 2p core level prior to (oxidized BP) and following (a) 30 and (b) 50 deposition cycles as a function of air exposure time 26 h and 72 h.

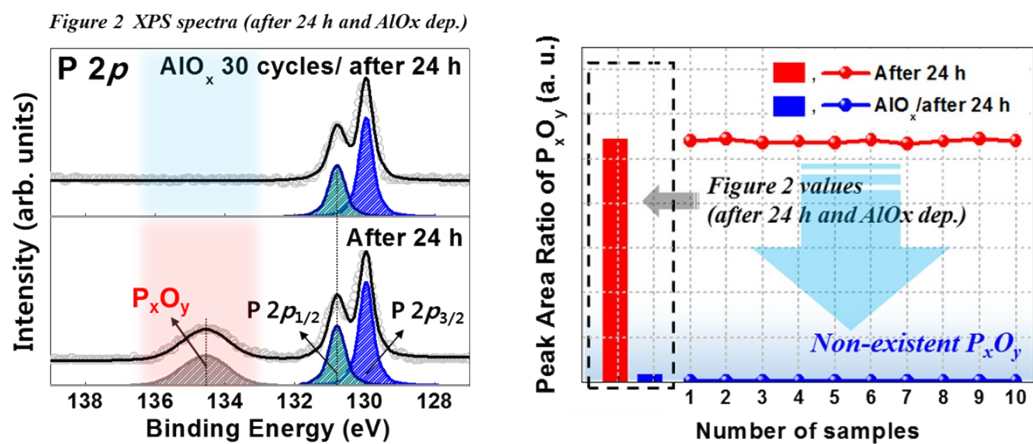

**Fig. S4** The cumulative distribution of change in the oxidized phosphorus species ( $P_xO_y$ ) measurements for statistical analysis in AlO<sub>x</sub> grown on oxidized BP (24 h) under the same thickness (30 cycles).

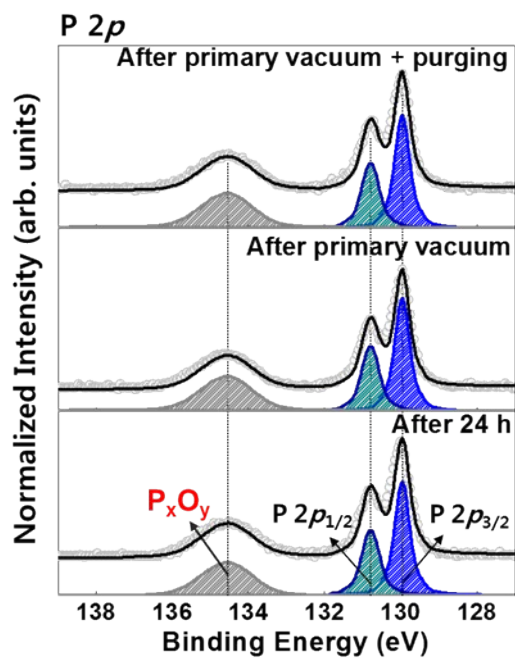

**Fig. S5** The stoichiometry and chemical state of the  $P_xO_y$  before and after ALD process. After primary vacuum and  $N_2$  purging process after primary vacuum in ALD, the binding energy and peak ratio of phosphorus species ( $P_xO_y$ ) was not changed, compared with that of air exposure for 24 h.

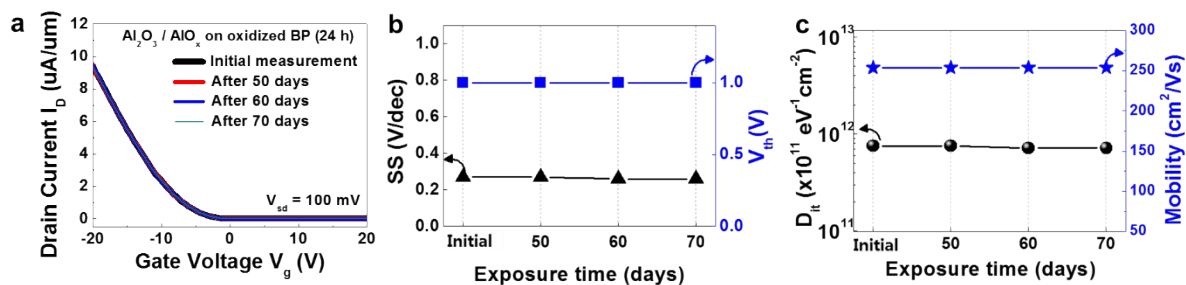

**Fig. S6** Comparison of cumulative electrical measurement of  $\text{Al}_2\text{O}_3/\text{AlO}_x/\text{oxidized BP}$  (24 h) FET device at different exposure time (after 50, 60 and 70 days). The (a)  $I_d$ - $V_{gs}$  characteristics for the carrier transport data and other values (b), and (c) of extracted mobility,  $D_{it}$ ,  $V_{th}$ , and SS are well consistent with those of initial measurement of FET device.

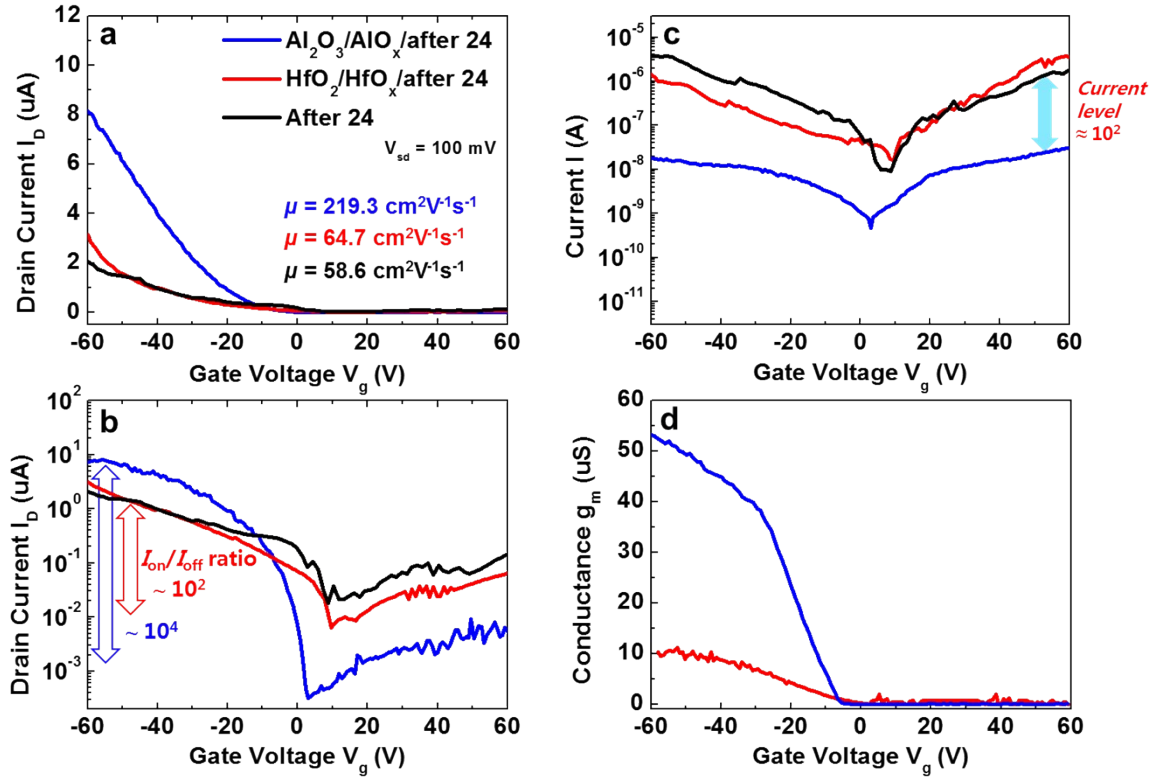

**Fig. S7** Back gating electrical characteristics of the ALD- $\text{Al}_2\text{O}_3/\text{AlO}_x$  and  $\text{HfO}_2/\text{HfO}_x$  on oxidized BP (surface exposed for 24 h)/ $\text{SiO}_2$ -300 nm/highly doped Si for field-effect transistors (FETs). The (a) and (b)  $I_d$ - $V_{gs}$  transfer curves were obtained by back gating FET device (gate voltage ( $V_g$ ) ranges of  $\pm 60$  V at a fixed drain voltage ( $V_{sd}$ ) of 0.1 V) and (c) gate leakage current and (d) transconductance.
